# Supplementary material for: Exploring the DNA methylome of Korean patients with colorectal cancer consolidates the clinical implications of cancer-associated methylation markers
Source: PubMed Central journal article supplement — BMB Rep. 2024 Mar 12;57(3):161–6. doi: 10.5483/BMBRep.2023-0103 (PMC10979344; doi:10.5483/bmbrep.2023-0103), 2024-03-12
Supplement: bmb-57-3-161-supple1.pdf [file bmb-57-3-161-supple1.pdf]

1 **SUPPLEMENTARY MATERIAL**

2 **Exploring the DNA methylome of Korean patients with colorectal cancer**  
3 **consolidates the clinical implications of cancer-associated methylation markers**

4

5 **Author names:** Sejoon Lee<sup>\*1</sup>, Kil-yong Lee<sup>\*2</sup>, Ji-Hwan Park<sup>\*3,4</sup>, Duck-Woo Kim<sup>5</sup>,  
6 Heung-Kwon Oh<sup>5</sup>, Seong-Taek Oh<sup>2</sup>, Jongbum Jeon<sup>3</sup>, Dongyoon Lee<sup>3</sup>, Soobok Joe<sup>3</sup>,  
7 Hoang Bao Khanh Chu<sup>6</sup>, Jisun Kang<sup>6</sup>, Jin-Young Lee<sup>6</sup>, Sheehyun Cho<sup>6</sup>, Hyeran Shim<sup>6</sup>,  
8 Si-Cho Kim<sup>6</sup>, Hong Seok Lee<sup>6</sup>, Young-Joon Kim<sup>6</sup>, Jin Ok Yang<sup>†3</sup>, Jaeim Lee<sup>†2</sup>, Sung-  
9 Bum Kang<sup>†5</sup>

10 \*These authors contributed equally to this work.

11 † corresponding author

12

13 **Affiliation:**

14 <sup>1</sup>Precision Medicine Center, Seoul National University Bundang Hospital, Seongnam  
15 13620, Republic of Korea

16 <sup>2</sup>Department of Surgery, Uijeongbu St. Mary's Hospital, College of Medicine, The  
17 Catholic University of Korea, Uijeongbu 11765, Republic of Korea

18 <sup>3</sup>Korea Bioinformation Center (KOBIC), Korea Research Institute of Bioscience and  
19 Biotechnology, Daejeon 34141, Republic of Korea

20 <sup>4</sup>Department of Bioscience, University of Science and Technology (UST), Daejeon  
21 34113, Republic of Korea

22 <sup>5</sup>Department of Surgery, Seoul National University Bundang Hospital, Seoul  
23 National University College of Medicine, Seongnam 13620, Republic of Korea

24 <sup>6</sup>Department of Biochemistry, College of Life Science and Biotechnology, Yonsei  
25 University, Seoul 03722, Republic of Korea

26 **Corresponding Author's Information**

27 Sung-Bum Kang, Tel.: +82-31-787-7087; Fax: +82-31-787-4077; E-mail:

28 kangsb@snuh.org

29 Jaeim Lee, Tel.: +82-31-820-5020; Fax: +82-31-847-2041; E-mail:

30 lji96@catholic.ac.kr

31 Jin Ok Yang, Tel: +82-42-879-8550; Fax: +82-42-879-8519; E-mail:

32 joy@kribb.re.kr

33

34 **This file includes:**

35

36 Supplementary Results

37 Supplementary Materials and Methods

38 Supplementary Figures 1 to 13

39 Supplemental Tables 1 to 8

40 : Supplemental Table 2 is provided in additional Excel spreadsheet.

41 Supplementary References

42

## 43 Supplementary Results

### 44 Identification of potential CRC diagnostic markers commonly used for diverse 45 ethnic groups

46 To ensure the reliability of our data, we examined the similarity in the  
47 differential methylation patterns with previously established public CRC methylome.  
48 To this end, we conducted a comparative analysis of the Korean methylation profiles  
49 and TCGA methylation profiles of the patients (consisting of 404 tumor samples and  
50 45 normal samples) assigned as colon adenocarcinoma (COAD) or rectum  
51 adenocarcinoma (READ). For the 15,968 probes (6,244 hypermethylated and 9,724  
52 hypomethylated positions), which were included in both the Illumina Infinium EPIC  
53 array and Illumina Infinium Human DNA Methylation 450K BeadChip (TCGA 450K)  
54 array platforms, we observed the analogous differential methylation patterns in the  
55 TCGA CRC dataset (**Supplementary Figure 10A**; See the details in **Supplementary**  
56 **Materials and Methods**). Additionally, when we compared the mean methylation  
57 differences for a total of 298,581 probes included in the both array platforms, we  
58 could also observe a robust correlation between the two datasets (**Supplementary**  
59 **Figure 10B**; Pearson's correlation coefficient: 0.948,  $p < 0.0001$ ). All these results  
60 demonstrated the reliability of the Korean CRC methylome, mitigating potential  
61 biases introduced by variations in array platforms. Moreover, our findings from this  
62 methylome dataset could be expanded to the patients from other ethnic groups.

63 Based on the similarity between the two methylome datasets, we tried to  
64 identify potential CRC diagnostic markers, which could be used for other ethnic  
65 groups, rather than Korean ethnicity. To this end, we first selected 15,968 DMPs that  
66 were included in the both array platforms. By applying a Lasso regularization with a  
67 logistic function to the selected DMPs, we prioritized 21 key methylation markers  
68 (10 hypermethylated and 11 hypomethylated markers, **Supplementary Figure 11**)  
69 which enabled the classification of the tumor samples from adjacent normal tissue  
70 samples in Korean patients with CRC (See the details in **Supplementary Materials**  
71 **and Methods**). After constructing a prediction model for CRC with the methylation  
72 levels of these 21 positions, we confirmed the methylation patterns of the markers  
73 and tested the robustness and reproducibility of the model on the TCGA CRC dataset.  
74 Notably, the 10 hypermethylated and 11 hypomethylated markers showed similar

75 hyper- and hypomethylation patterns in TCGA CRC dataset, respectively  
76 (**Supplementary Figure 12A and Supplementary Table 8**). Moreover, the test of the  
77 model on TCGA CRC dataset yielded impressive predictive metrics: precision at  
78 0.995, recall at 0.963, an overall accuracy of 0.962, and an area under the curve  
79 (AUC) of 0.960 (**Supplementary Figure 12B, C**). As an orthogonal validation of these  
80 markers, we also confirmed the 3 hypermethylation and 4 hypomethylation  
81 patterns from another studies, which conducted whole-genome bisulfite  
82 sequencing of CRC samples (**Supplementary Figure 13**) (1-4).

83

84

## 85 **Supplementary Materials and Methods**

### 86 **Clinical specimens from CRC patients**

87 In this study, we performed methylome profiling of the tumor and adjacent normal  
88 tissues from Korean patients with CRC. The two hospital datasets used in this study  
89 comprised 344 samples from the Seoul National University Bundang Hospital  
90 (BUNDANG; 165 samples) and The Catholic University Uijeong St. Mary's Hospital  
91 (SUNGMO; 179 samples). Of these, 235 tumor samples were from BUNDANG (130)  
92 and SUNGMO (105) and 109 normal samples were from BUNDANG (35) and  
93 SUNGMO (74).

94

### 95 **Methylation microarray analysis**

96 Genomic DNA (gDNA) was isolated from the tumor and adjacent normal tissues  
97 using the PureLink™ Genomic DNA Mini Kit (Invitrogen, Waltham, MA, USA), and its  
98 quality was checked using a NanoDrop® (ND-2000, Waltham, MA, USA) and  
99 agarose gel electrophoresis (1% gel; run conducted at 100 V for 30 min). Intact  
100 gDNA was diluted to 50 ng/μl based on Quant-iT Picogreen (Invitrogen, Waltham,  
101 MA, USA) quantitation and subjected to bisulfite conversion using the EZ DNA  
102 Methylation Kit (ZymoResearch, USA). Subsequently, the converted gDNA was  
103 amplified up to 1,000-fold through whole-genome amplification and then  
104 hybridized to the Infinium MethylationEPIC BeadChip (V1; WG-317-1001, Illumina,  
105 San Diego, CA, USA) following the manufacturer's recommended protocol. After  
106 completing the single-base extension in the Te-Flow chamber, the BeadChip was  
107 imaged using the iScan System (SY-101-1001, Illumina, San Diego, CA, USA) to  
108 produce raw data in the IDAT format.

109

### 110 **Preprocessing the raw data by normalization, batch correction, and probe filtration**

111 The EPIC array dataset was processed using the *minfi*(v1.36) pipeline (5). Initially,  
112 the raw intensities of 865,859 probes were extracted from the Cy3-green and Cy5-  
113 red channels of the raw .IDAT files. We evaluated the quality of the methylome data  
114 by inspecting the overall distribution of beta values and control strip plots, which

115 included the bisulfite conversion efficiency, extension quality, and specificity  
116 (Supplementary Figure 2). We then applied subset-quantile within array  
117 normalization (SWAN) (6) to correct technical discrepancies between type I and  
118 type II probes within each array. Next, we addressed the known batch effects  
119 specific to each EPIC array batch type by using the surrogate variable analysis (SVA)  
120 tool in conjunction with the *combat* method (7), followed by the removal of the  
121 1,049 probes with the high batch bias. For downstream analysis, we filtered out sex-  
122 mismatched samples (11 samples) and excluded additional probes based on several  
123 dependencies for the further analysis. The excluded probes were methylation data  
124 of sex chromosomes (19,179 probes), known single nucleotide polymorphism (SNP)  
125 sites (161,078 probes) according to the genome annotations of the EPIC array, and  
126 poor-performing sites (1,881 probes) with their p values of probe detection ratio  $>$   
127 0.01. Additionally, for each probe, we calculated the difference between maximum  
128 and minimum beta values across all samples and excluded the 92,600 probes with  
129 the absolute differences  $<$  0.1 for further analysis. Finally, 609,046 probe  
130 methylation beta values from 228 tumor and 105 normal samples (Supplementary  
131 Table 1 and Supplementary Figure 1) were used for downstream analysis. Of note,  
132 103 tumor and normal samples were obtained from the same patients. In this  
133 process, we compared the distribution of beta values between the raw and  
134 processed probes via principal component (PC) analysis (PCA), which revealed sex-  
135 and batch-related biases in the raw data (Supplementary Figure 3 and 4).

136

### 137 Identification of DMPs

138 To identify differentially methylated positions (DMPs) between the tumor and  
139 normal samples, we applied an  $F$ -test by using the *dmpfinder* function (8) from the  
140 *minfi* package (5). The  $p$  values of the  $F$ -test were adjusted to  $q$ -values by using  
141 Benjamini-Hochberg (9) procedure. We identified the DMPs as the ones with i) the  
142 absolute difference in the mean beta values between the tumor and normal samples  
143  $>$  0.15 and ii) the  $q$ -values  $<$   $1 \times 10^{-6}$ . The hyper- and hypomethylated positions in  
144 tumors were determined as the DMPs with the difference in the mean beta values  $>$   
145 0.15 and  $<$  -0.15, respectively. For annotation of genomic regions, we used EPIC  
146 array manual 1.05B ([https://support.illumina.com/array/array\\_kits/infinium-](https://support.illumina.com/array/array_kits/infinium-)

147 methylationepic-beadchip-kit/downloads.html) (TSS1500: 1500 base pairs to 200  
148 base pairs upstream of the transcription start site [TSS]; TSS200: 200 base pairs  
149 upstream of the TSS to the TSS; Shore: 2 kb from each end of the island, Shelf: from  
150 2 to 4 kb from the CpG island; Open sea: outside of CpG islands, shores, and shelves).

151 We then performed enrichment analysis for each genomic annotation (*e.g.*,  
152 CpG island and open-sea regions and TSS1500 and first exon regions in **Figure 1E**)  
153 and by calculating the odds ratio for hyper- and hypomethylated DMPs. To compute  
154 the enrichment significance, we estimated an empirical null distribution of the odds  
155 ratio by performing random sampling experiments 10,000 times. Briefly, in each  
156 experiment, probes with sizes that were same as those of the hyper- or  
157 hypomethylated positions were randomly sampled, and the odds ratio was  
158 measured. For each genomic annotation, the  $p$  values for the odds ratio were  
159 calculated using the empirical distributions by the one-tailed test.

160

#### 161 **Functional enrichment analysis of GOBPs and KEGG pathways**

162 The enrichment analysis was performed for the hyper- and hypomethylated  
163 positions annotated with genomic regions (at TSS1500, TSS200, 5'-UTR, first exon,  
164 body, and 3'-UTR) by using DAVID software (10). For each genomic region, we first  
165 obtained the GenBank accession IDs linked to the individual DMPs. The GOBPs from  
166 GOBP FAT and KEGG pathways represented by the accession IDs were identified as  
167 the ones with the enrichment  $p < 0.05$  and the number of genes  $> 4$ . Moreover, to  
168 further examine the effectiveness of the enrichment  $p$  values of the hyper- and  
169 hypomethylated positions, we selected a set of negative control positions at each  
170 region, which were not differentially methylated, as the positions with i) the  
171 absolute difference in the mean beta values between the tumor and normal samples  
172  $< 0.05$  and ii) the  $p$  values  $> 0.9$ . We also calculated the enrichment  $p$  values of the  
173 GOBPs and KEGG pathways for the negative control positions at each genomic  
174 region. For visualization in the heat map, the enrichment  $p$  value was converted into  
175 a Z-score by  $Z = N^{-1}(1 - p)$ , where  $N^{-1}(\cdot)$  denotes the inverse standard normal  
176 distribution.

177

## 178 **Comparative analysis of the methylome profiles between Korean CRC and TCGA CRC**

179 Among a total of the 609,046 probes in the Illumina Infinium EPIC array, 298,581  
180 probes were also included in Illumina Infinium Human DNA Methylation 450K  
181 BeadChip (TCGA 450K) array platform, which was used for TCGA CRC cohort  
182 (consisting of 404 tumor samples and 45 normal samples). For these overlapped  
183 probes, we computed the mean differences of the methylation levels between  
184 tumor and adjacent normal tissues in the TCGA dataset. We then assessed the  
185 similarity of the mean differences between two CRC cohorts by calculating Pearson's  
186 correlation coefficient. Similarly, among the 38,607 DMPs identified from the Korean  
187 CRC methylome, we found that 15,968 probes were included in the TCGA 450K array  
188 and then also measured the similarity of the mean differences of methylation levels.

189

## 190 **Identification of methylation markers for a predictive modeling of CRC diagnosis**

191 To construct a predictive model for CRC diagnosis, we selected the methylation  
192 markers from the 15,968 DMPs, which were the probes included in the TCGA 450K  
193 array, by applying a feature selection methodology based on Lasso regularization  
194 (11) coupled with a logistic regression function. Briefly, by using all the beta values  
195 of the DMPs from tumor and adjacent normal tissues of Korean patients with CRC,  
196 we iteratively ran Lasso modeling 200 times. Among the 15,968 DMPs, we  
197 determined 21 probes, which had non-zero coefficients in at least 50% of 200 runs,  
198 as the methylation markers used for the prediction of the disease. Subsequently, a  
199 new logistic regression model was developed by using the beta values of the 21  
200 methylation markers in the methylome data and clinical information of the Korean  
201 cohort to predict the occurrence of CRC. To evaluate the robustness and  
202 reproducibility of the constructed prediction model, we applied the model into the  
203 independent dataset, namely the TCGA CRC methylome.

204

## 205 **Clustering of the tumor samples based on the CIMP markers**

206 Among the CIMP probe set (4,327 probes) derived from 258 previously identified  
207 CIMP gene markers (12), we selected 1,470 highly variable sites with their absolute



208 value of standard deviation  $> 0.15$ . For 228 tumor samples, we performed K-means  
209 clustering 100 times on the beta values of the selected CIMP marker probes. The  
210 tumor samples were categorized into three groups, and each group was classified as  
211 CIMP-H, CIMP-L, or non-CIMP based on the respective mean methylation level for  
212 each group.

213

### 214 **Association and enrichment analysis of clinicopathological characteristics with the** 215 **CIMP status**

216 To investigate the associations between CIMP status and clinicopathological  
217 characteristics, we employed various statistical methods tailored to the type and  
218 distribution of the data. For categorical clinical variables, such as sex, and, location,  
219 a Chi-square test was performed to assess the independence between CIMP status  
220 and the variables, excluding the AJCC stage, T-stage, differentiation, and MSI status.  
221 Since the four variables had at least one categories with fewer than five samples, we  
222 performed a Fisher's exact test. For the clinicopathological variables with the  $p$   
223 values of the significance  $< 0.05$ , we further conducted an enrichment analysis of  
224 clinicopathological characteristics for CIMP status, by calculating the expected  
225 frequencies, and standardized residuals from a contingency table. We determined  
226 the significantly enriched clinicopathological variables (i.e., when the observed  
227 frequency significantly exceeded the expected frequency) as the ones with their  $p$   
228 values of the enrichment significance  $< 0.05$  and standardized residuals  $> 1.5$ .

229 Regarding continuous variables, we examined the significance of the mean  
230 differences of age, CIMP markers, and *MLH1* methylation levels across the three  
231 CIMP groups by applying an analysis of variance (ANOVA) with Sidak correction as a  
232 post hoc test (13). For the relapse-free survival analysis, used log-rank test (14).

233

### 234 **Identification of novel CIMP marker candidates from the Korean CRC methylation** 235 **profiles**

236 To identify the novel CIMP marker candidates, we selected 680 probes from the  
237 7,824 hypermethylated positions in the tumor samples according to the following

238 criteria: high variability in the methylation levels (standard deviation  $> 0.2$ ) and  
239 annotations to CpG island region. To test whether the selected probes show the  
240 similar stratification performance to that of the CIMP markers, we performed K-  
241 means clustering on the beta values of the selected probes, and obtained three  
242 clusters (C1 - C3). We measured the similarity between the stratification of the  
243 Korean patients by using the selected probes and the CIMP stratification by  
244 calculating how many patients in CIMP-High, CIMP-Low, and non-CIMP were  
245 belonged to each of C1 - C3.

246 Finally, we determined 16 novel CIMP marker candidates from the 680  
247 probes as the probes with their mean differences of methylation levels  $> 0.2$  and p  
248 values of a pairwise *T*-test  $< 0.0001$  in the following comparisons: (i) CIMP-H versus  
249 CIMP-L groups and (ii) CIMP-L versus non-CIMP groups.

250

### 251 **Calculation of methylation levels of the promoter-like region**

252 For each gene, we computed the methylation levels of the promoter-like region by  
253 averaging the beta values of all the probes annotated as the promoter-like regions  
254 (TSS1500, TSS200, 5' UTR, and first exon).

255

256

257 **Supplementary Figures and Tables**

258

259

260

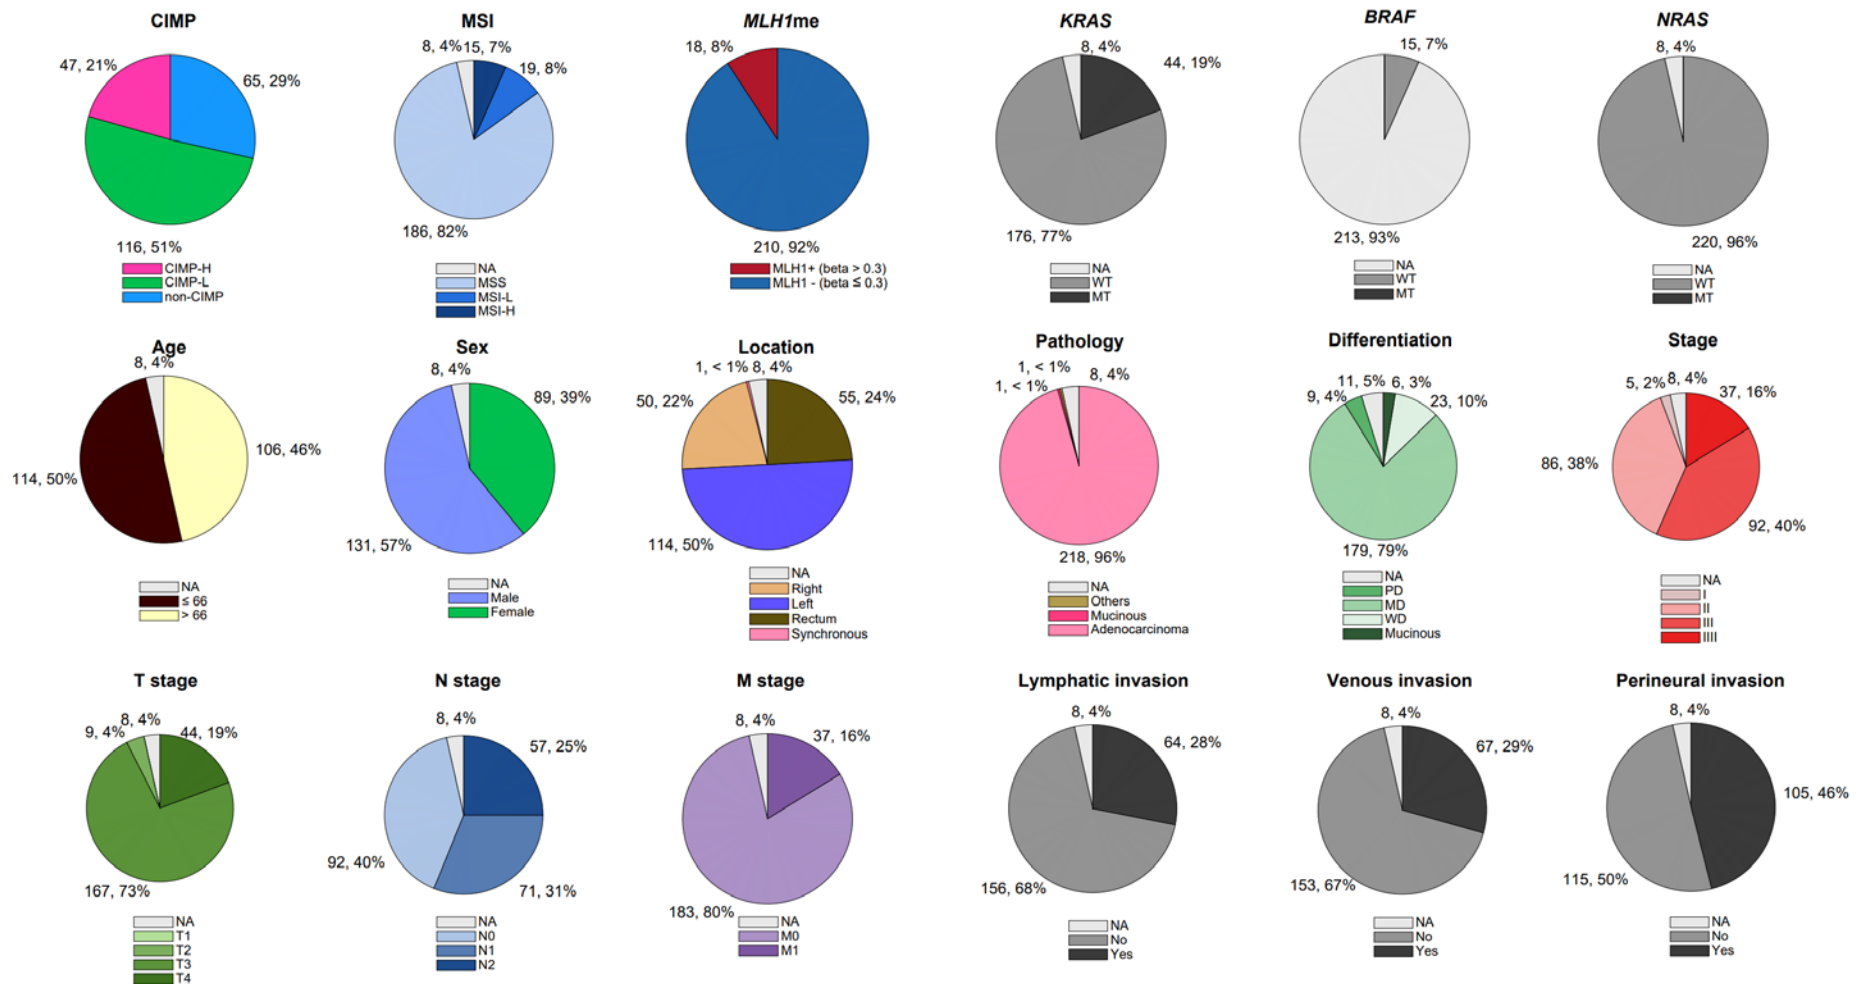

**Supplementary Figure 1. Clinicopathological characteristics of the 228 patients with CRC.** For each of the 18 clinical characteristics, distribution of 228 Korean CRC patients are shown as a pie chart including the proportion of not applicable

information. For the individual categories of each characteristics, the numbers and percentages of patients are described in the chart. For location, right-sided locations include ascending, cecum, hepatic flexure, transverse, and left-sided locations include descending, rectosigmoid, sigmoid, and splenic flexure. CIMP: 5'-C-phosphate-G-3' island methylator phenotype. MSI: microsatellite instability; MSS: microsatellite stability; MSI-H: high microsatellite instability; MSI-L: low microsatellite instability; MT: mutation; WT: wild type; WD: well-differentiated; MD: moderately differentiated; PD: poorly differentiated; Yes: Presence of cancer cells in lymph vessels or in blood vessels or surrounding nerves; No: Absence of cancer cells in lymph vessels or in blood vessels or surrounding nerves; NA, not applicable.

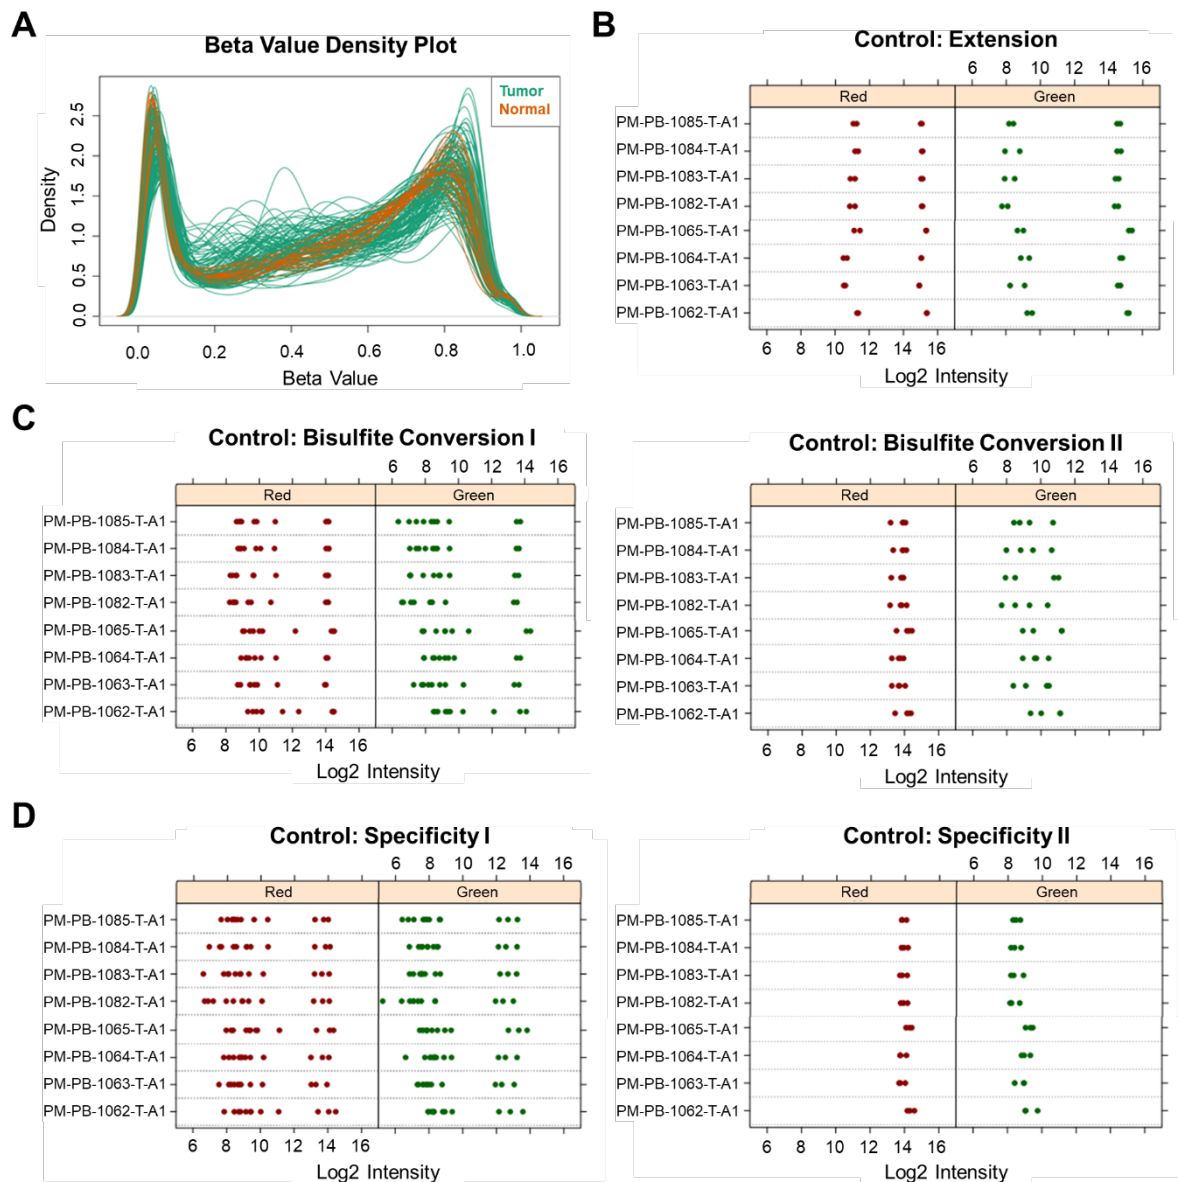

Supplementary Figure 2. Density plot of methylation beta values and control strip plots.

A. Density plot of the methylation beta values from individual samples (orange: normal samples; green: tumor samples). B - D. Examples of control strip plots representing extension efficiency (B), bisulfite conversion efficiency (C), and specificity (D).

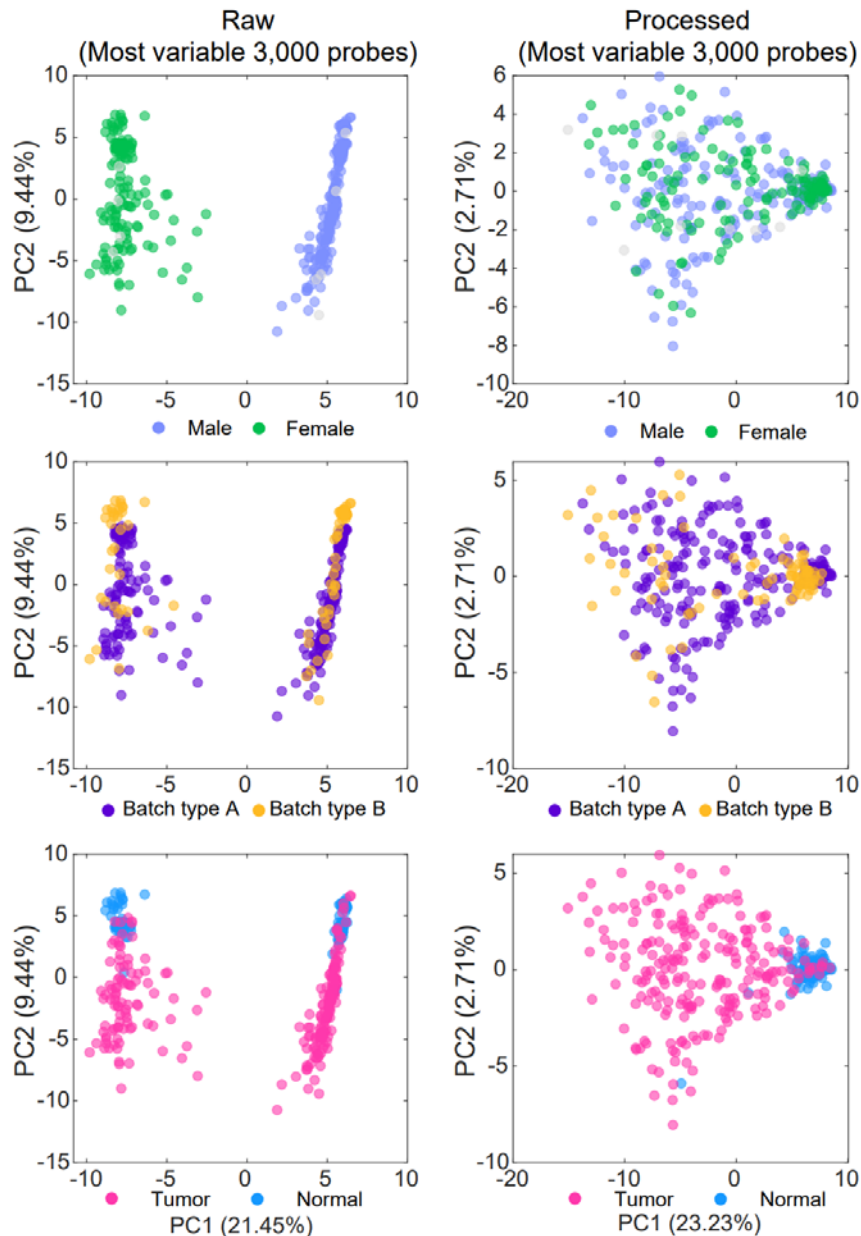

**Supplementary Figure 3. Comparison of the methylation dataset before and after the bias correction.** Among the total probes, we used the 3,000 probes with the largest variance of beta values across all samples for a principal component (PC) analysis of raw (before bias correction; left) and processed (after bias correction; right) datasets. The plots show the PC1 (x-axis) and PC2 (y-axis) with their explained variances. The individual samples in the plots were labeled according to sex (top: male and female), batch number (middle: batch types), and tumor status (bottom: tumor and normal).

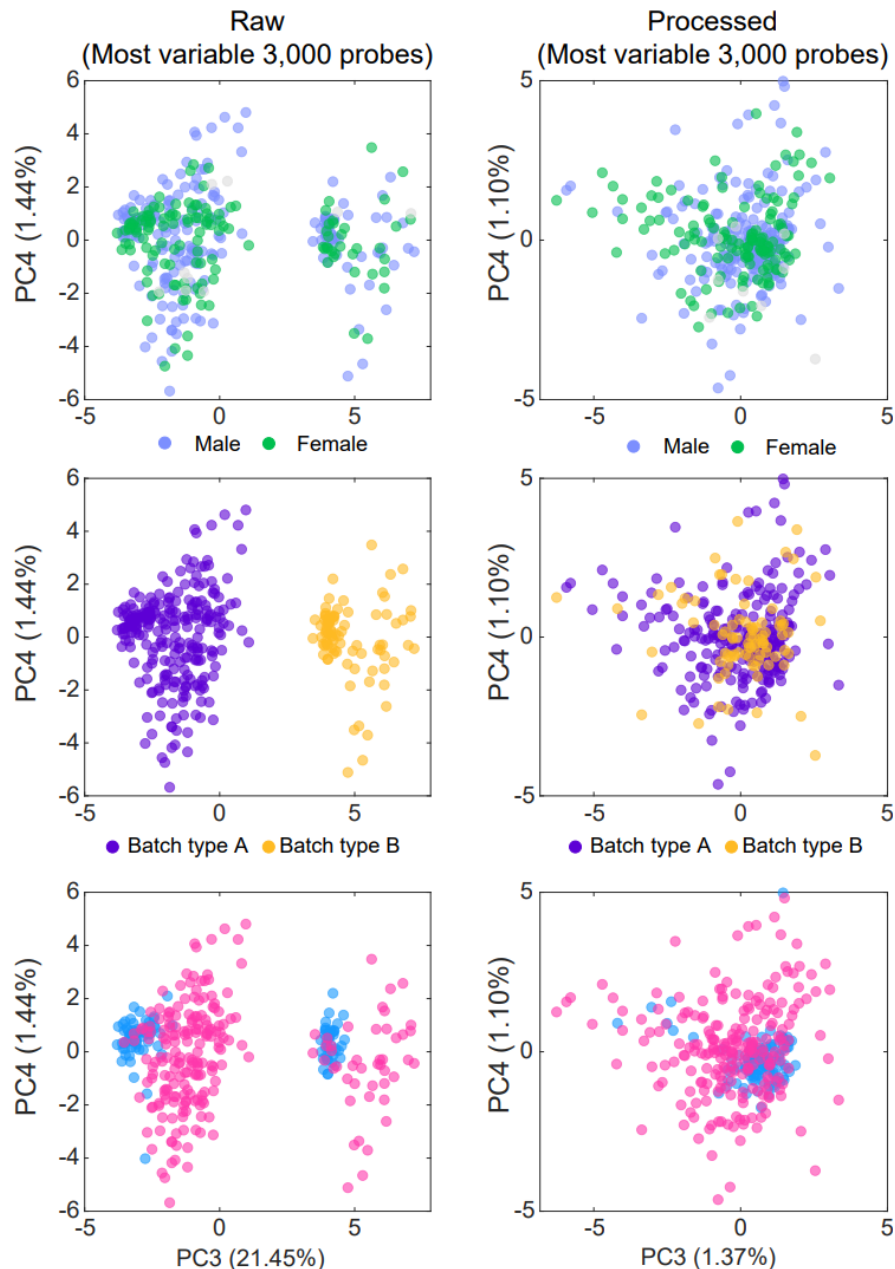

**Supplementary Figure 4. Comparison of the methylation dataset before and after the bias correction.** Among the total probes, we used the 3,000 probes with the largest variance of beta values across all samples for a principal component (PC) analysis of raw (before bias correction; left) and processed (after bias correction; right) datasets. The plots show the PC3 (x-axis) and PC4 (y-axis) with their explained variances. The individual samples in the plots were labeled according to sex (top: male and female), batch number (middle: batch types), and tumor status (bottom: tumor and normal).



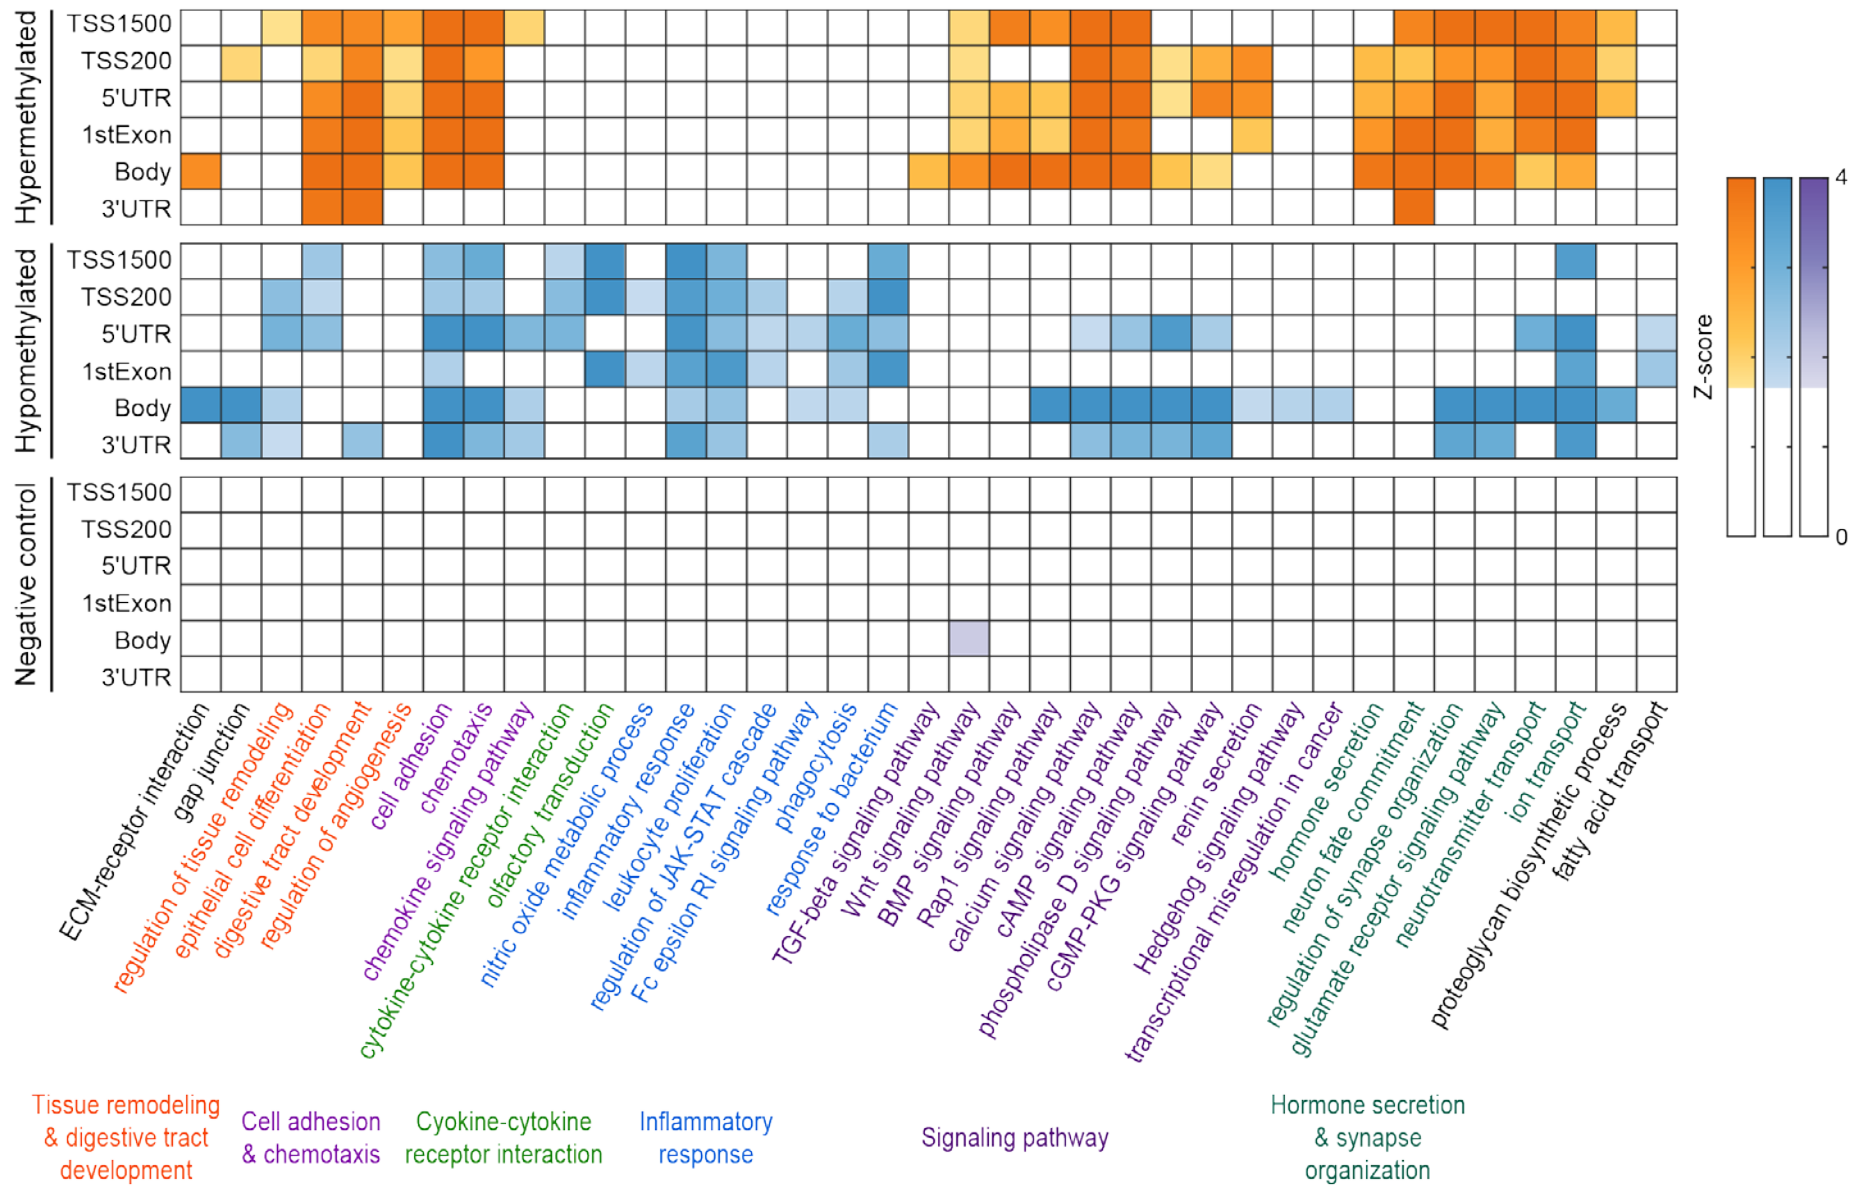

**Supplementary Figure 5. Heat map showing the functional enrichment patterns of GOBPs and KEGG pathways by hyper- and hypomethylated, and negative control positions at genomic regions (TSS1500, TSS200, 5'-UTR, first exon, body, and 3'-UTR). Color bar, gradient of Z-score for the enrichment  $p$  value computed by using DAVID software. A set of negative control positions at each region were determined as the ones with i) the absolute difference in the mean beta values between the tumor and normal samples  $< 0.05$  and ii) the  $p$  values  $> 0.9$ .**

Kaplan-Meier estimate of survival functions

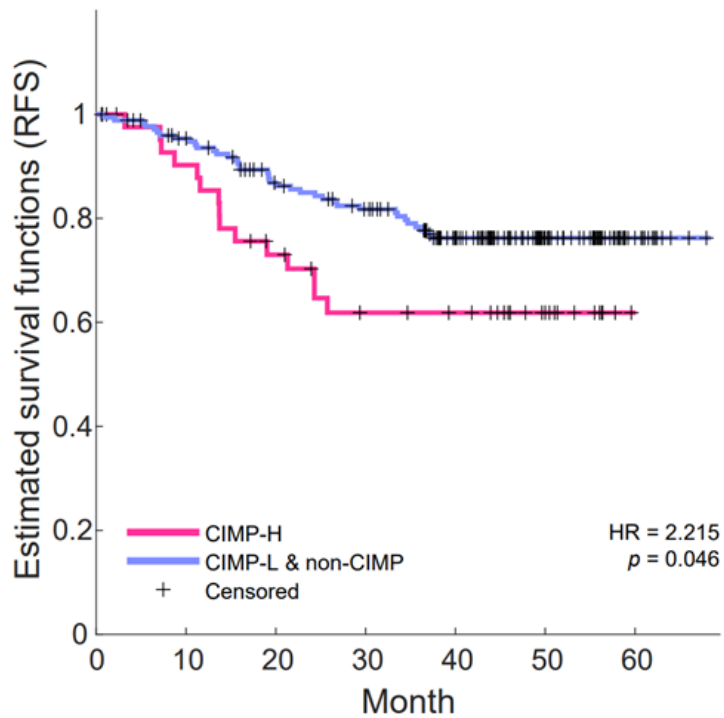

**Supplementary Figure 6.** Recurrence free survival analysis. Kaplan-Meier plot for CIMP-H and non CIMP-H groups. HR,  $p$  represent hazard ratio and significance of log-rank test, respectively.

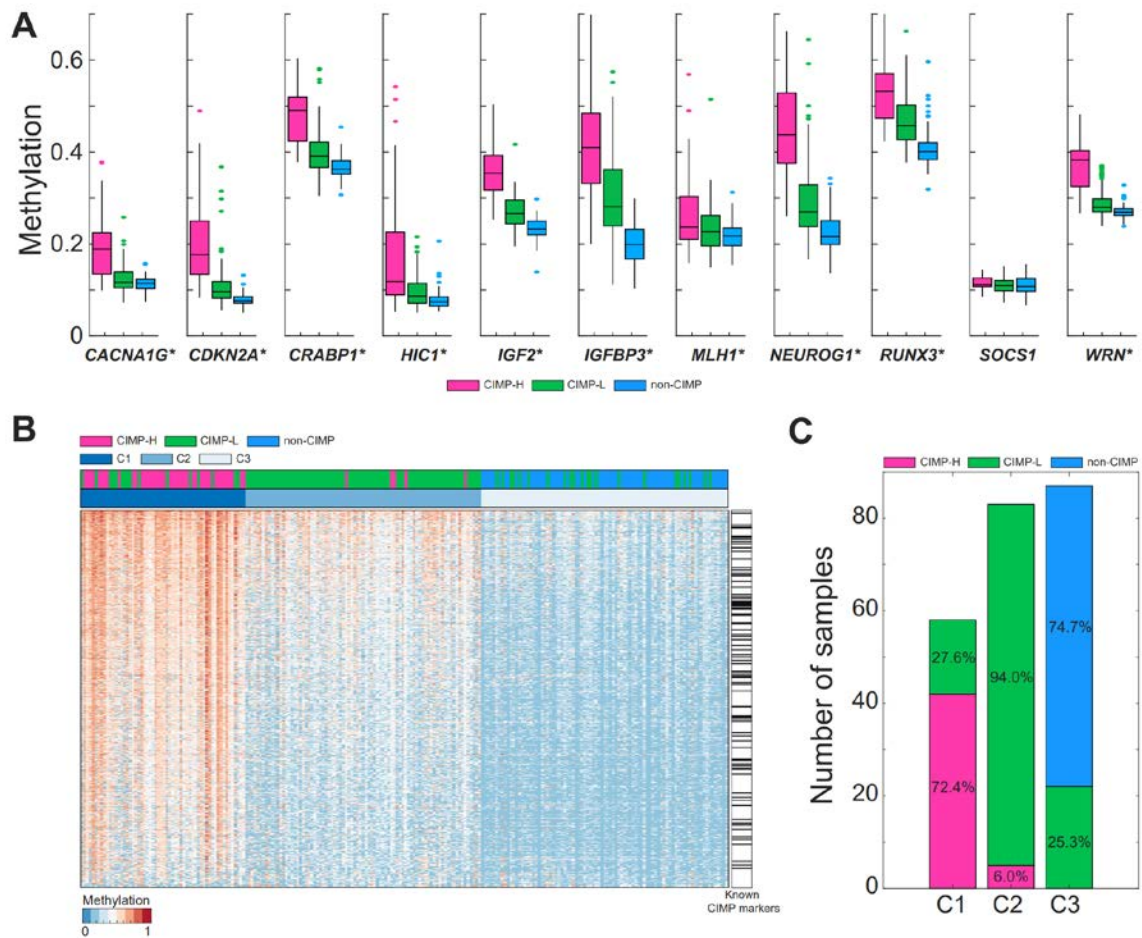

**Supplementary Figure 7. Comparative analysis of hypermethylation patterns in Korean CRC according to CIMP categories.** (A) Comparison with promoter methylation levels across the three CIMP subgroups: CIMP-H, CIMP-L, and non-CIMP. ‘\*’ denotes the significance  $p$  values ( $< 0.05$ ) of the mean difference between CIMP-H and non CIMP-H. (B) Clustering of the methylation profiles of 680 selected hypermethylated probes. Labels C1, C2, and C3 denote new cluster groups defined by these 680 hypermethylated probes. The right-hand black-and-white bar represents the categorization based on previously defined CIMP marker probes (C) Proportional representation of established CIMP categories within newly defined C1, C2, and C3 clusters. We found that C1, C2, and C3 were likely to be matched to CIMP-H, CIMP-L, and non-CIMP.

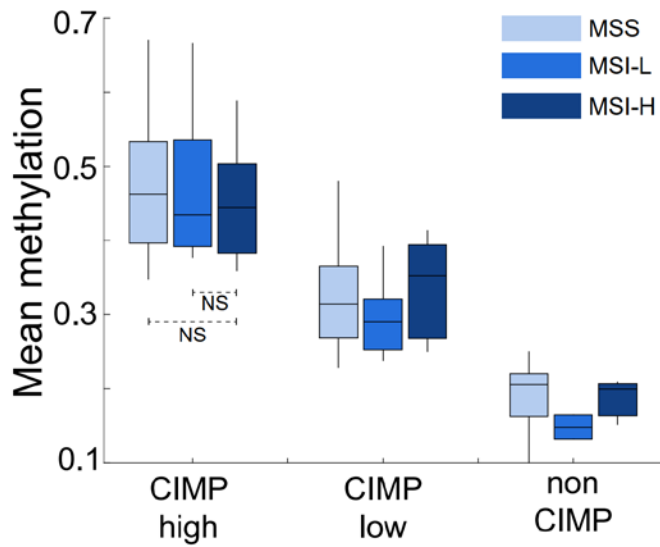

**Supplementary Figure 8. Boxplot showing mean beta values of CIMP marker probes for the patient groups classified as their CIMP and microsatellite instability (MSI) statuses.** The boxes display the lower, median and upper quartiles; the whiskers represent the minimum and maximum values. NS denotes not significant by one-way ANOVA with a post hoc test (Sidak correction).

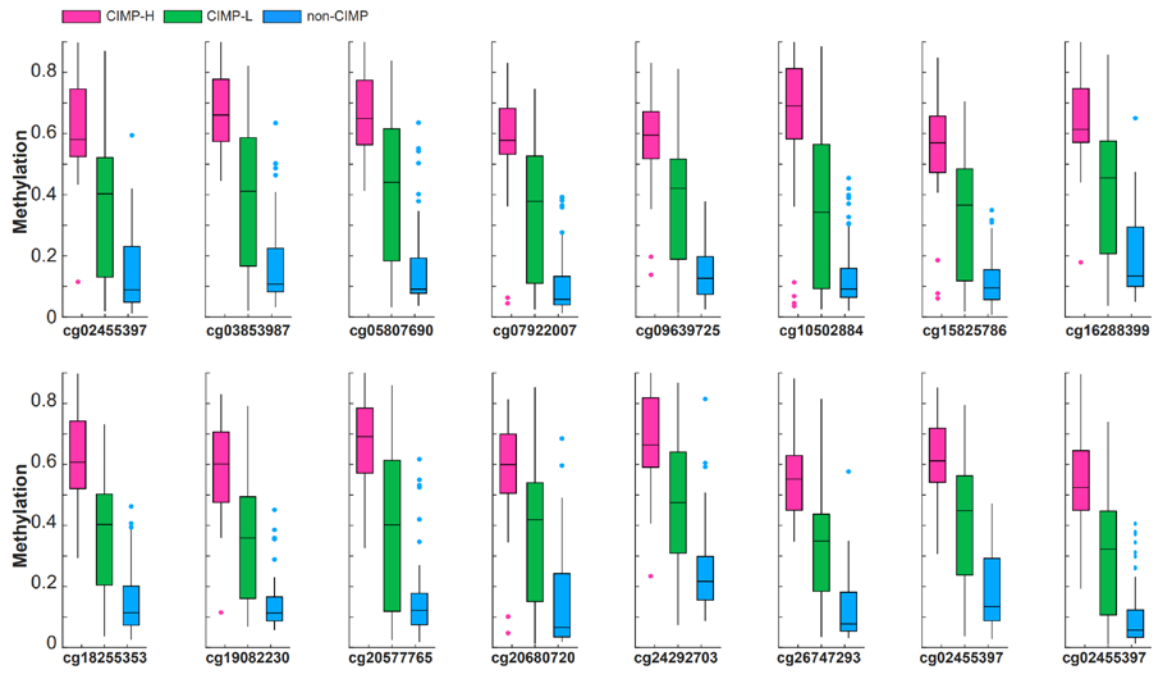

Supplementary Figure 9. Comparison with methylation levels of 16 cg probes across the three CIMP subgroups: CIMP-H, CIMP-L, and non-CIMP.

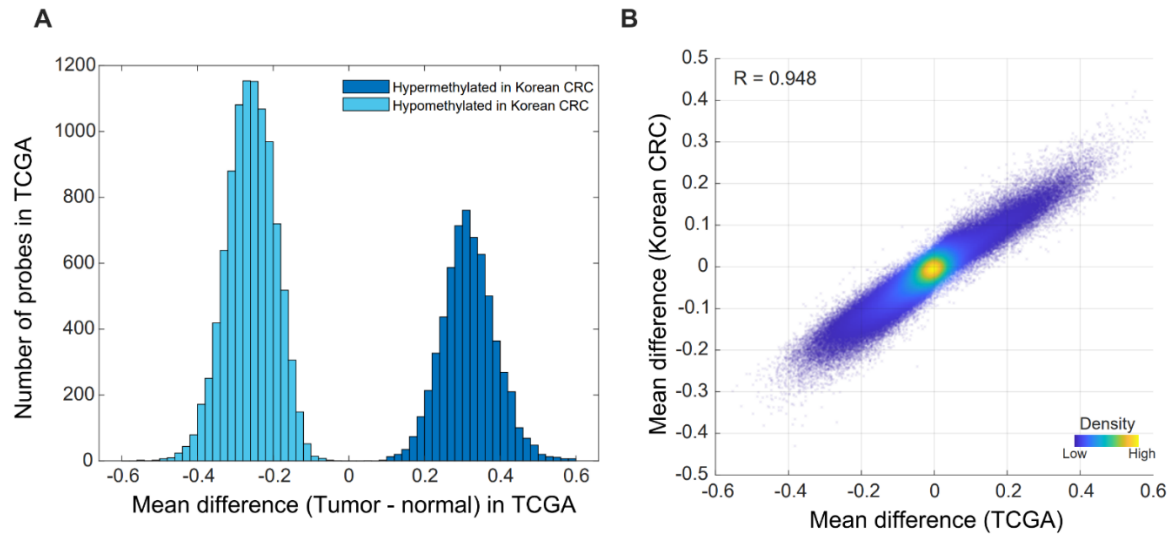

**Supplementary Figure 10. Comparative Analysis of CRC methylomes between Korean and TCGA cohorts.** (A) Distribution of methylation levels observed in the TCGA CRC dataset at differentially methylated positions (DMPs) in Korean CRC. (B) Correlation analysis between Korean and TCGA CRC focusing on the 298,581 overlapping probes; 'R' denotes Pearson's correlation coefficient.

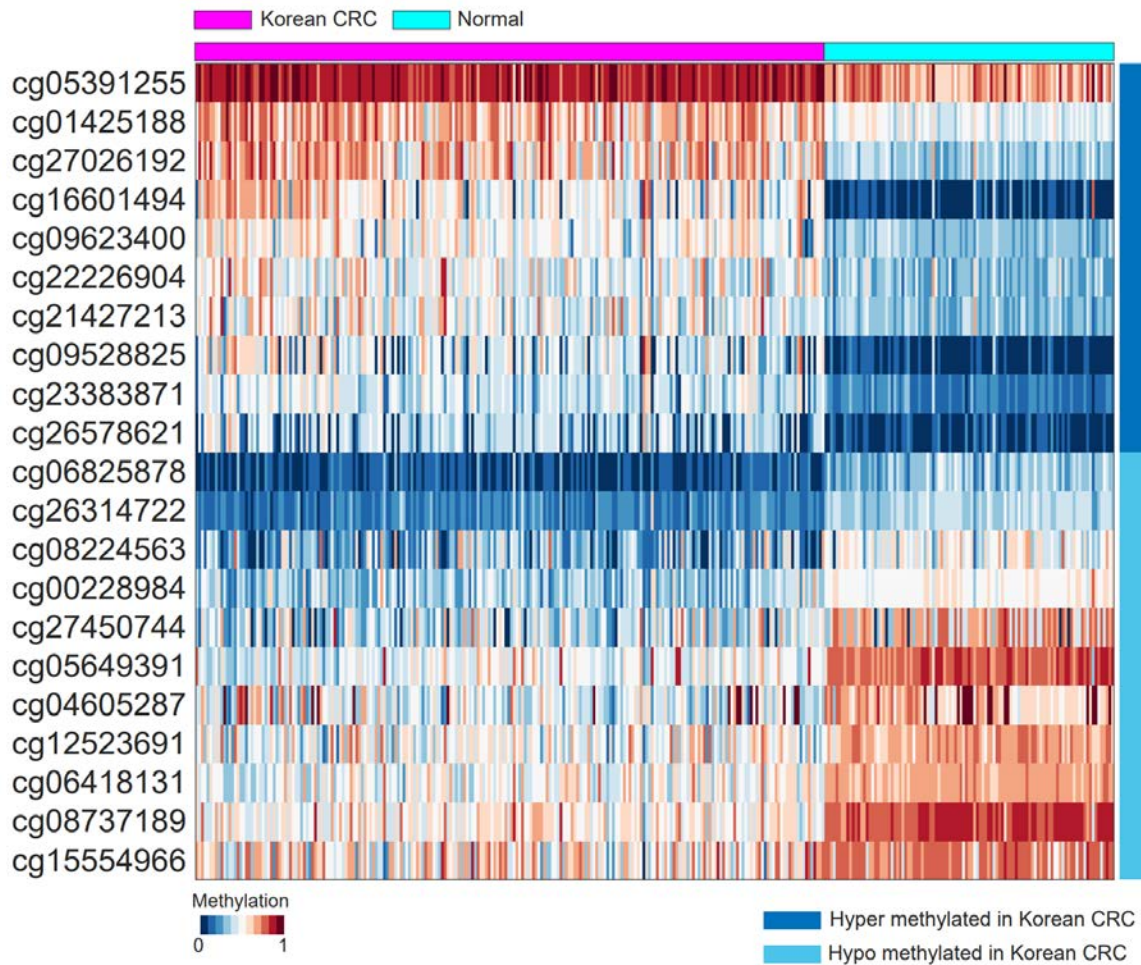

**Supplementary Figure 11. Methylation Profiles of 21 selected probes for CRC diagnosis in a Korean cohort.** The heatmap displays the methylation beta values for 10 hypermethylated and 11 hypomethylated probes. In the sample color bar, magenta represents CRC samples, and light blue indicates adjacent normal tissue. The probe color bar employs dark blue and sky blue to hypermethylated and hypomethylated probes in Korean CRC, respectively.



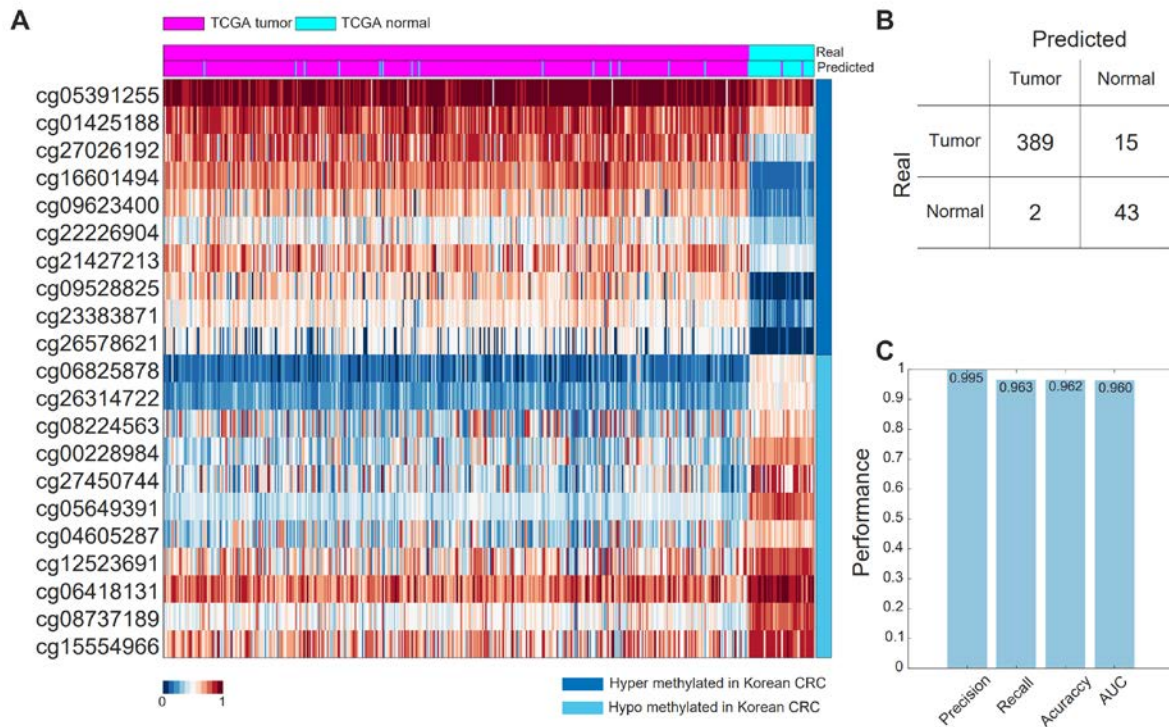

**Supplementary Figure 12. Validation of CRC prediction in the TCGA Cohort using 21 diagnostic markers from Korean CRC.** (A) Methylation profiles of the 21 selected diagnostic probes in the TCGA CRC cohort. In the sample color bar, magenta denotes CRC samples, and light blue represents adjacent normal tissues. 'Predicted' and 'Real' indicate model predictions and actual cancer annotations, respectively. The probe color bar utilizes dark blue and sky blue to signify hypermethylated and hypomethylated probes from the Korean CRC study, respectively. (B) Confusion matrix illustrating the counts of prediction of the CRC classifier model in the TCGA CRC cohort. (C) Performance metrics assessing the accuracy of CRC presence predictions in the independent TCGA cohort.





E

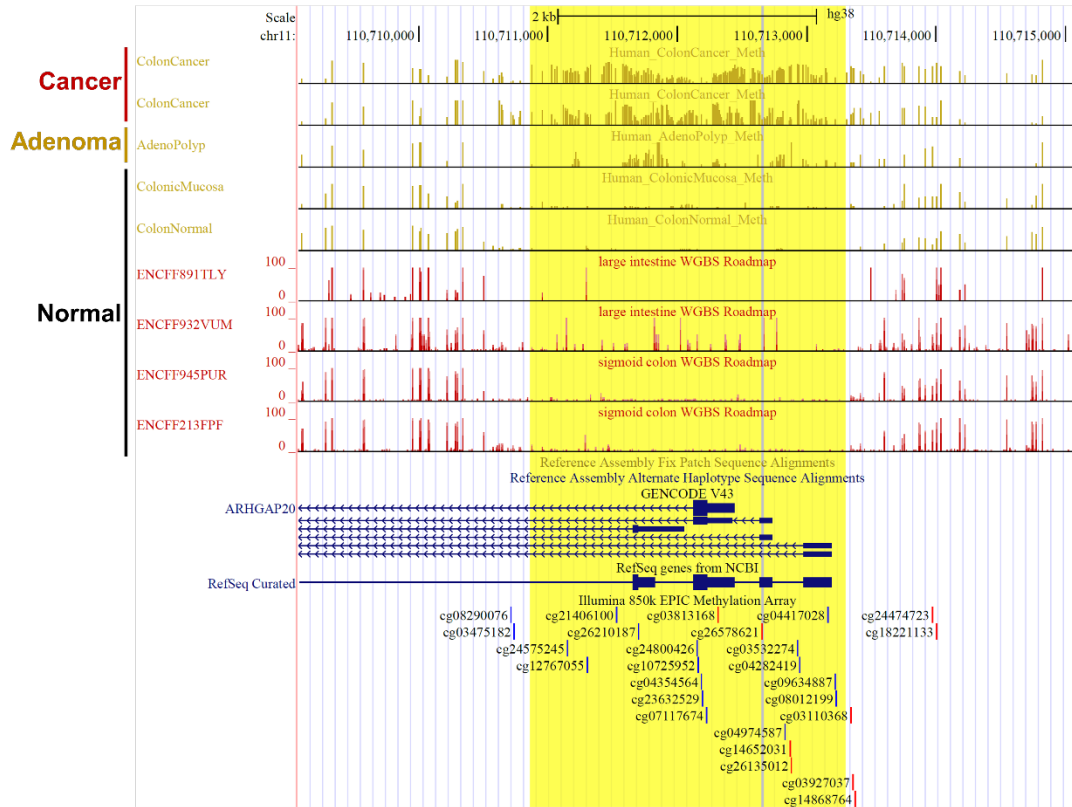

F

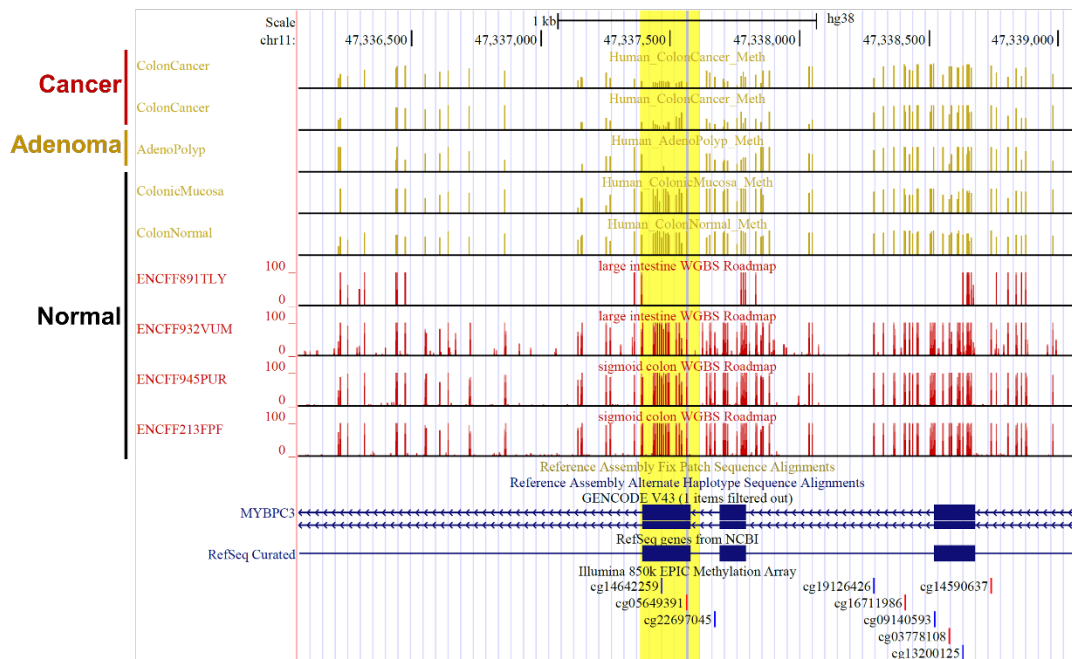

**G**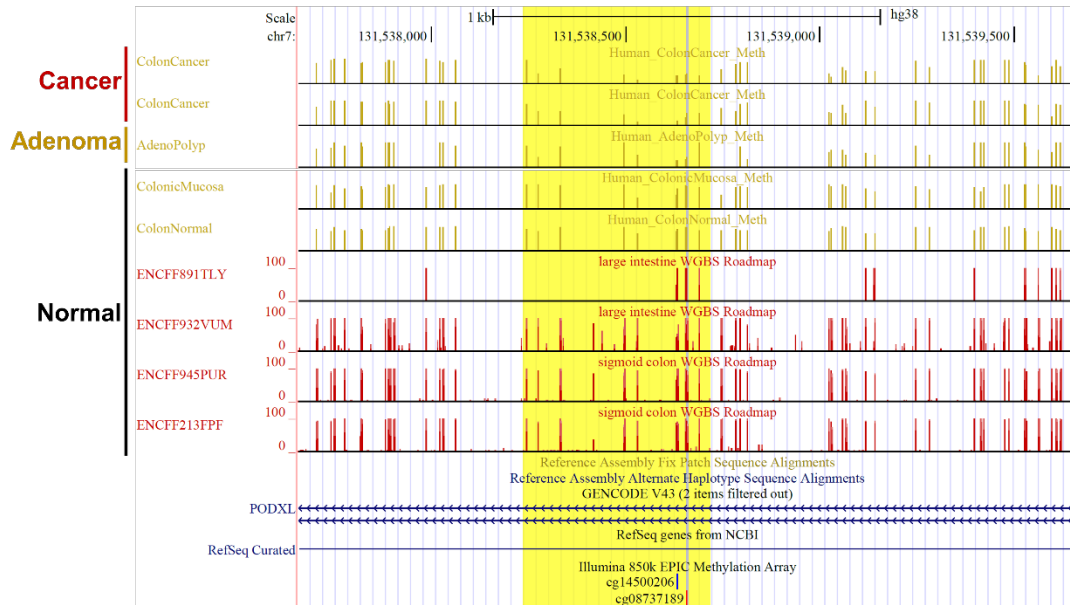

**Supplementary Figure 13. WGBS-based Methylation levels of regions around selected CRC diagnosis markers.** Visualization of WGBS-based methylation levels of regions around the marker using UCSC genome browser (A) cg09528825, (B) cg09623400, (C) cg16601494, (D) cg23383871, (E) cg26578621, (F) cg05649391, and (G) cg08737189. WGBS-based methylation levels of colorectal cancer (red, the 1<sup>st</sup> and 2<sup>nd</sup> tracks), adenoma (light brown, the 3<sup>rd</sup> track) and normal (black, the 4<sup>th</sup> - 9<sup>th</sup> tracks) are shown. The 10<sup>th</sup> and 11<sup>th</sup> tracks show gene annotation from GENCODE and RefSeq respectively. The 12<sup>th</sup> track shows the location of probes from Illumina 850K EPIC methylation array. Blue and yellow background highlight the methylation marker and the region around it, respectively.

Supplementary Table 1. Clinicopathological characteristics of 228 patients with colorectal cancer (CRC).

| Clinicopathological characteristics | Total <sup>a</sup><br>(N = 228) | CIMP <sup>b</sup> group |                       |                        | <i>p</i> value  |
|-------------------------------------|---------------------------------|-------------------------|-----------------------|------------------------|-----------------|
|                                     |                                 | CIMP-H<br>47 (20.6%)    | CIMP-L<br>116 (50.9%) | non-CIMP<br>65 (28.5%) |                 |
| <b>Sex</b>                          |                                 |                         |                       |                        | NS              |
| Female                              | 89 (40.5%)                      | 21 (47.7%)              | 43 (37.7%)            | 25 (40.3%)             |                 |
| Male                                | 131 (59.5%)                     | 23 (52.3%)              | 71 (62.3%)            | 37 (59.7%)             |                 |
| Age (years)                         | 64.4 ± 12.7                     | 66.0 ± 13.3             | 64.7 ± 12.9           | 62.9 ± 11.8            | NS              |
| <b>Location<sup>c</sup></b>         |                                 |                         |                       |                        | <i>p</i> < 0.05 |
| Right-sided                         | 50 (22.8%)                      | 15 (34.1%)              | 31 (27.2%)            | 4 (6.6%)               |                 |
| Left-sided                          | 114 (52.1%)                     | 19 (43.2%)              | 54 (47.4%)            | 41 (67.2%)             |                 |
| Rectum                              | 55 (25.1%)                      | 10 (22.7%)              | 29 (25.4%)            | 16 (26.2%)             |                 |
| <b>MSI<sup>d</sup></b>              |                                 |                         |                       |                        | <i>p</i> < 0.05 |
| MSI-H                               | 15 (6.8%)                       | 6 (13.6%)               | 6 (5.3%)              | 3 (4.8%)               |                 |
| MSI-L                               | 19 (8.6%)                       | 7 (15.9%)               | 10 (8.8%)             | 2 (3.2%)               |                 |
| MSS                                 | 186 (84.5%)                     | 31 (70.5%)              | 98 (86.0%)            | 57 (91.9%)             |                 |
| <b>KRAS<sup>e</sup></b>             |                                 |                         |                       |                        | NS              |
| MT                                  | 44 (20.0%)                      | 12 (27.3%)              | 24 (21.1%)            | 8 (12.9%)              |                 |
| WT                                  | 176 (80.0%)                     | 32 (72.7%)              | 90 (78.9%)            | 54 (87.1%)             |                 |
| <b>Stage</b>                        |                                 |                         |                       |                        | NS              |
| I                                   | 5 (2.3%)                        | 1 (2.3%)                | 4 (3.5%)              | 0 (0%)                 |                 |
| II                                  | 86 (39.1%)                      | 18 (40.9%)              | 39 (34.2%)            | 29 (46.8%)             |                 |
| III                                 | 92 (41.8%)                      | 18 (40.9%)              | 51 (44.7%)            | 23 (37.1%)             |                 |
| IV                                  | 37 (16.8%)                      | 7 (15.9%)               | 20 (17.5%)            | 10 (16.1%)             |                 |
| <b>T stage</b>                      |                                 |                         |                       |                        | NS              |
| II                                  | 9 (4.1%)                        | 1 (2.3%)                | 7 (6.1%)              | 1 (1.6%)               |                 |
| III                                 | 167 (75.9%)                     | 30 (68.2%)              | 91 (79.8%)            | 46 (74.2%)             |                 |

|                                       |             |            |            |            |    |
|---------------------------------------|-------------|------------|------------|------------|----|
| <b>IV</b>                             | 44 (20.0%)  | 13 (29.5%) | 16 (14.0%) | 15 (24.2%) |    |
| <b>N stage</b>                        |             |            |            |            | NS |
| <b>N0</b>                             | 92 (41.8%)  | 19 (43.2%) | 44 (38.6%) | 29 (46.8%) |    |
| <b>N1</b>                             | 71 (32.3%)  | 11 (25.0%) | 39 (34.2%) | 21 (33.9%) |    |
| <b>N2</b>                             | 57 (25.9%)  | 14 (31.8%) | 31 (27.2%) | 12 (19.4%) |    |
| <b>M stage</b>                        |             |            |            |            | NS |
| <b>M0</b>                             | 183 (83.2%) | 37 (84.1%) | 94 (82.5%) | 52 (83.9%) |    |
| <b>M1</b>                             | 37 (16.8%)  | 7 (15.9%)  | 20 (17.5%) | 10 (16.1%) |    |
| <b>Differentiation<sup>f</sup></b>    |             |            |            |            | NS |
| <b>WD</b>                             | 23 (10.6%)  | 4 (9.3%)   | 13 (11.6%) | 6 (9.7%)   |    |
| <b>MD</b>                             | 179 (82.5%) | 33 (76.7%) | 94 (83.9%) | 52 (83.9%) |    |
| <b>PD</b>                             | 9 (4.1%)    | 2 (4.7%)   | 4 (3.6%)   | 3 (4.8%)   |    |
| <b>Mucinous</b>                       | 6 (2.8%)    | 4 (9.3%)   | 1 (0.9%)   | 1 (1.6%)   |    |
| <b>Lymphatic invasion<sup>g</sup></b> |             |            |            |            | NS |
| <b>Yes</b>                            | 64(29.1%)   | 15(34.1%)  | 34(29.8%)  | 15(24.2%)  |    |
| <b>No</b>                             | 156(70.9%)  | 29(65.9%)  | 80(70.2%)  | 47(75.8%)  |    |
| <b>Venous invasion</b>                |             |            |            |            | NS |
| <b>Yes</b>                            | 67(30.5%)   | 14(31.8%)  | 34(29.8%)  | 19(30.6%)  |    |
| <b>No</b>                             | 153(69.5%)  | 30(68.2%)  | 80(70.2%)  | 43(69.4%)  |    |
| <b>Perineural invasion</b>            |             |            |            |            | NS |
| <b>Yes</b>                            | 105(47.7%)  | 18(40.9%)  | 62(54.4%)  | 25(40.3%)  |    |
| <b>No</b>                             | 115(52.3%)  | 26(59.1%)  | 52(45.6%)  | 37(59.7%)  |    |

<sup>a</sup>For each clinical category, we excluded patients without relevant information when we calculated the percentages in the table. For example, 220 patients (89 females and 131 males) were considered as 100% for sex category (40.5% and 59.5% for female and male, respectively). The relevant information of age, MSI, KRAS, NRAS, stage, and TNM-stages categories was missing for eight patients. Differentiation category was missing for 11 patients. When we classified the tumor locations into "left", "right", and "rectum" groups, we excluded one synchronous tumor sample (i.e., multiple presence of both left and right

location) and samples of the aforementioned eight patients from the groups. <sup>b</sup>CIMP: 5'-C-phosphate-G-3' island methylator phenotype. <sup>c</sup>Right-sided: ascending, cecum, hepatic flexure, transverse; Left-sided: descending, rectosigmoid, sigmoid, splenic flexure; <sup>d</sup>MSI: microsatellite instability; MSS: microsatellite stability; MSI-H: high microsatellite instability; MSI-L: low microsatellite instability; <sup>e</sup>MT: mutation; WT: wild type; <sup>f</sup>WD: well-differentiated; MD: moderately differentiated; PD: poorly differentiated; <sup>g</sup>Yes: Presence of cancer cells in lymph vessels or in blood vessels or surrounding nerves; No: Absence of cancer cells in lymph vessels or in blood vessels or surrounding nerves. p values represent the significance of association test with CIMP groups, ANOVA for continuous characteristic (age), Chi-square test for categorical characteristics (Sex, MSI, KRAS, N stage, M stage, lymphatic, venous, perineural invasion types), and Fisher's exact test for categorical characteristics with fewer than 5 samples in specific subtypes (AJCC stage, T stage, Differentiation). NS denotes not significant.



**Supplementary Table 2. List of hyper- and hypomethylated positions.**

A total of 7,824 hypermethylated (A) and 30,783 hypomethylated positions (B) are shown with the differences of the mean beta values between the tumor and normal tissues as well as the relevant annotations in terms of CpG-island-associated and genic regions.

See the attached excel file named “Supplementary Table 2.xlsx”

Supplementary Table 3. Distribution of hyper- and hypomethylated positions in the genic regions

| Genic region | Number of annotated EPIC probes | Number of hyper-methylated DMPs | Odds ratio of hyper-methylated DMPs | Number of hypo-methylated DMPs | Odds ratio of hypo-methylated DMPs | p value of the odds ratio (hyper-methylated DMPs) | p value of the odds ratio (hypo-methylated DMPs) |
|--------------|---------------------------------|---------------------------------|-------------------------------------|--------------------------------|------------------------------------|---------------------------------------------------|--------------------------------------------------|
| TSS1500      | 79055                           | 1344                            | 1.3972                              | 2672                           | 0.6245                             | $<1 \times 10^{-4}$                               | 1                                                |
| TSS200       | 36337                           | 1420                            | 3.5963                              | 643                            | 0.3243                             | $<1 \times 10^{-4}$                               | 1                                                |
| UTR5         | 67792                           | 1653                            | 2.1671                              | 2263                           | 0.6209                             | $<1 \times 10^{-4}$                               | 1                                                |
| F_Exon       | 22006                           | 1012                            | 4.1059                              | 391                            | 0.3313                             | $<1 \times 10^{-4}$                               | 1                                                |
| BODY         | 267555                          | 2561                            | 0.6174                              | 11115                          | 0.7092                             | 1                                                 | 1                                                |
| UTR3         | 18586                           | 147                             | 0.6052                              | 550                            | 0.5651                             | 1                                                 | 1                                                |
| <b>Total</b> | 609046                          | 7824                            |                                     | 30783                          |                                    |                                                   |                                                  |

Supplementary Table 4. Distribution of hyper- and hypomethylated positions in the CpG-island-associated regions

| CpG Island | Number of annotated EPIC probes | Number of hyper-methylated DMPs | Odds ratio of hyper-methylated DMPs | Number of hypo-methylated DMPs | Odds ratio of hypo-methylated DMPs | p value of the odds ratio (hyper-methylated DMPs) | p value of the odds ratio (hypo-methylated DMPs) |
|------------|---------------------------------|---------------------------------|-------------------------------------|--------------------------------|------------------------------------|---------------------------------------------------|--------------------------------------------------|
| S shelf    | 22990                           | 96                              | 0.3138                              | 804                            | 0.6722                             | 1                                                 | 1                                                |
| S shore    | 49264                           | 591                             | 0.9276                              | 945                            | 0.3474                             | 0.9644                                            | 1                                                |
| Island     | 77220                           | 5131                            | 13.9850                             | 286                            | 0.0611                             | $<1 \times 10^{-4}$                               | 1                                                |
| N shore    | 58149                           | 857                             | 1.1678                              | 1173                           | 0.3625                             | $<1 \times 10^{-4}$                               | 1                                                |
| N shelf    | 24862                           | 111                             | 0.3352                              | 860                            | 0.6637                             | 1                                                 | 1                                                |
| Open sea   | 376561                          | 1038                            | 0.0919                              | 26715                          | 4.2877                             | 1                                                 | $<1 \times 10^{-4}$                              |
| Total      | 609046                          | 7824                            |                                     | 30783                          |                                    |                                                   |                                                  |

Supplementary Table 5. List of 16 CIMP methylation markers

| Probe ID   | Chromosome | Locus (hg38)        | CpG island | Gene name     | Genic region  | Mean Difference<br>(CIMP-H vs CIMP-L) | Mean Difference<br>(CIMP-L vs non-CIMP) |
|------------|------------|---------------------|------------|---------------|---------------|---------------------------------------|-----------------------------------------|
| cg02455397 | chr11      | 119422674-119422676 | Island     | THY1          | 5UTR          | 0.239                                 | 0.228                                   |
| cg03853987 | chr2       | 100417816-100417818 | Island     | CHST10        | TSS200        | 0.275                                 | 0.231                                   |
| cg05807690 | chr2       | 100417820-100417822 | Island     | CHST10        | TSS200        | 0.259                                 | 0.244                                   |
| cg07922007 | chr8       | 66962622-66962624   | Island     |               |               | 0.239                                 | 0.234                                   |
| cg09639725 | chr10      | 133087789-133087791 | Island     | GPR123        | TSS200        | 0.219                                 | 0.229                                   |
| cg10502884 | chr10      | 124092798-124092800 | Island     |               |               | 0.299                                 | 0.213                                   |
| cg15825786 | chr10      | 133087792-133087794 | Island     | GPR123        | TSS200        | 0.222                                 | 0.210                                   |
| cg16288399 | chr11      | 119422666-119422668 | Island     | THY1;USP2-AS1 | 5UTR:Body     | 0.224                                 | 0.227                                   |
| cg18255353 | chr4       | 153791269-153791271 | Island     |               |               | 0.245                                 | 0.223                                   |
| cg19082230 | chr4       | 182448600-182448602 | Island     | ODZ3          | Body          | 0.235                                 | 0.214                                   |
| cg20577765 | chr2       | 100417832-100417834 | Island     | CHST10        | TSS200        | 0.287                                 | 0.228                                   |
| cg20680720 | chr19      | 36916313-36916315   | Island     | ZNF568;ZNF829 | TSS200:TSS200 | 0.211                                 | 0.213                                   |
| cg24292703 | chr14      | 56797920-56797922   | Island     |               |               | 0.207                                 | 0.221                                   |
| cg26747293 | chr5       | 38258567-38258569   | Island     | EGFLAM;EGFLAM | 1stExon:5UTR  | 0.227                                 | 0.204                                   |
| cg27515369 | chr3       | 141051756-141051758 | Island     | SPSB4         | TSS200        | 0.215                                 | 0.227                                   |
| cg27591450 | chr17      | 77528921-77528923   | Island     |               |               | 0.240                                 | 0.205                                   |

Supplementary Table 6. Eleven hypermethylated gene markers associated with six cancer-related pathways

| Genes                | Promoter-like* probes                                                                                                                                                                            | GOBP/KEGG pathways (reported in this study) |                            |                       |               |                            |                        |
|----------------------|--------------------------------------------------------------------------------------------------------------------------------------------------------------------------------------------------|---------------------------------------------|----------------------------|-----------------------|---------------|----------------------------|------------------------|
|                      |                                                                                                                                                                                                  | WNT signaling pathway                       | TGF-beta signaling pathway | BMP signaling pathway | Cell adhesion | Regulation of angiogenesis | cAMP signaling pathway |
| <i>SFRP1</i><br>(15) | cg04255616<br>cg10406295<br>cg21517947                                                                                                                                                           | 0                                           |                            | 0                     | 0             | 0                          |                        |
| <i>SFRP2</i><br>(15) | cg00082664<br>cg03202804<br>cg05164933<br>cg05961809<br>cg06549216<br>cg10942078<br>cg11354906<br>cg14063488<br>cg14330641<br>cg23121156<br>cg23207990<br>cg23292160<br>cg25645268<br>cg25775322 | 0                                           |                            | 0                     | 0             |                            |                        |
| <i>SOX17</i><br>(15) | cg04672706<br>cg15186181<br>cg24891539<br>cg26059468                                                                                                                                             | 0                                           |                            |                       |               |                            |                        |
| <i>WIF1</i><br>(15)  | cg03509412<br>cg19427610<br>cg26733786                                                                                                                                                           | 0                                           |                            |                       |               |                            |                        |
| <i>SMAD1</i><br>(18) | cg16071998                                                                                                                                                                                       |                                             | 0                          | 0                     |               | 0                          |                        |
| <i>SMAD2</i><br>(18) | cg26130023                                                                                                                                                                                       |                                             | 0                          | 0                     |               |                            |                        |
| <i>CDH13</i>         | cg05374412                                                                                                                                                                                       |                                             |                            |                       | 0             |                            |                        |

|                           |                                                                                                              |  |  |  |   |   |   |
|---------------------------|--------------------------------------------------------------------------------------------------------------|--|--|--|---|---|---|
| (19)                      |                                                                                                              |  |  |  |   |   |   |
| <i>TMEFF2</i><br>(20)     | cg01808545<br>cg02288301<br>cg06008912<br>cg06856528<br>cg09237843<br>cg18107367<br>cg18221862<br>cg24899822 |  |  |  | o |   |   |
| <i>ADAMTS1</i><br>(21-23) | cg00472814<br>cg12282100<br>cg15621322<br>cg24262066                                                         |  |  |  | o | o |   |
| <i>ADCY1</i><br>(24)      | cg07651242<br>cg07960450<br>cg24676071                                                                       |  |  |  |   |   | o |
| <i>ADCY4</i><br>(25)      | cg05031016<br>cg12265829<br>cg23179456                                                                       |  |  |  |   |   | o |

\*Promoter-like represents the regions which were annotated with TSS200, TSS1500, 5'UTR, and first exon.

Supplementary Table 7. Comparison of tumor stages between The Cancer Genome Atlas (TCGA) colorectal cancer dataset and the proposed Korean patients with colorectal cancer.

| Data source | Stage |     |     |    |
|-------------|-------|-----|-----|----|
|             | I     | II  | III | IV |
| Korea_CRC   | 5     | 86  | 92  | 37 |
| TCGA_CRC    | 56    | 103 | 69  | 44 |

Supplementary Table 8. List of 21 diagnostic methylation markers

| Probe ID   | Chromosome | Locus (hg38)        | CpG island | Gene name | Genic region  | Mean Difference (Korean CRC)<br>Tumor - Normal | Mean Difference (TCGA)<br>Tumor - Normal |
|------------|------------|---------------------|------------|-----------|---------------|------------------------------------------------|------------------------------------------|
| cg01425188 | chr8       | 28621759-28621761   | N_Shore    |           |               | 0.196                                          | 0.186                                    |
| cg05391255 | chr12      | 68931181-68931183   | N_Shelf    | CPM       | Body          | 0.178                                          | 0.091                                    |
| cg09528825 | chr16      | 28063066-28063068   | Island     | GSG1L     | Body          | 0.330                                          | 0.485                                    |
| cg09623400 | chr20      | 24469716-24469718   | Island     | TMEM90B   | 5UTR, 1stExon | 0.186                                          | 0.416                                    |
| cg16601494 | chr1       | 1540356-1540358     | N_Shore    | C1orf70   | 5UTR, 1stExon | 0.423                                          | 0.557                                    |
| cg21427213 | chr3       | 188155186-188155188 | S_Shore    | LPP       | 5UTR          | 0.173                                          | 0.215                                    |
| cg22226904 | chr1       | 27492548-27492550   | S_Shelf    |           |               | 0.162                                          | 0.172                                    |
| cg23383871 | chr20      | 49318449-49318451   | Island     |           |               | 0.228                                          | 0.327                                    |
| cg26578621 | chr11      | 110712653-110712655 | Island     | ARHGAP20  | 5UTR, 1stExon | 0.235                                          | 0.358                                    |
| cg27026192 | chr16      | 57803047-57803049   | Island     | KIFC3     | TSS1500       | 0.270                                          | 0.348                                    |
| cg00228984 | chr20      | 1491237-1491239     | OpenSea    | SIRPB2    | Body          | -0.167                                         | -0.285                                   |
| cg04605287 | chr1       | 54487812-54487814   | N_Shore    |           |               | -0.187                                         | -0.167                                   |
| cg05649391 | chr11      | 47337563-47337565   | N_Shore    | MYBPC3    | Body          | -0.298                                         | -0.367                                   |
| cg06418131 | chr6       | 32055872-32055874   | OpenSea    | TNXB      | Body          | -0.179                                         | -0.149                                   |
| cg06825878 | chr7       | 75843221-75843223   | OpenSea    |           |               | -0.207                                         | -0.389                                   |
| cg08224563 | chr16      | 20904982-20904984   | S_Shelf    | LYRM1     | 5UTR          | -0.191                                         | -0.143                                   |
| cg08737189 | chr7       | 131538657-131538659 | OpenSea    | PODXL     | Body          | -0.267                                         | -0.286                                   |
| cg12523691 | chr4       | 168796529-168796531 | OpenSea    | PALLD     | Body          | -0.182                                         | -0.226                                   |
| cg15554966 | chr19      | 53679931-53679933   | OpenSea    | MIR519E   | TSS200        | -0.160                                         | -0.195                                   |
| cg26314722 | chr1       | 234731552-234731554 | OpenSea    |           |               | -0.176                                         | -0.284                                   |
| cg27450744 | chr8       | 142564299-142564301 | Island     |           |               | -0.190                                         | -0.244                                   |



## Supplementary References

1. Consortium EP (2012) An integrated encyclopedia of DNA elements in the human genome. *Nature* 489, 57–74
2. Hansen KD, Timp W, Bravo HC et al (2011) Increased methylation variation in epigenetic domains across cancer types. *Nat Genet* 43, 768–775
3. Berman BP, Weisenberger DJ, Aman JF et al (2011) Regions of focal DNA hypermethylation and long-range hypomethylation in colorectal cancer coincide with nuclear lamina-associated domains. *Nat Genet* 44, 40–46
4. Song Q, Decato B, Hong EE et al (2013) A reference methylome database and analysis pipeline to facilitate integrative and comparative epigenomics. *PLoS One* 8, e81148
5. Aryee MJ, Jaffe AE, Corrada-Bravo H et al (2014) Minfi: a flexible and comprehensive Bioconductor package for the analysis of Infinium DNA methylation microarrays. *Bioinformatics* 30, 1363–1369
6. Maksimovic J, Gordon L and Oshlack A (2012) SWAN: Subset-quantile within array normalization for illumina infinium HumanMethylation450 BeadChips. *Genome Biol* 13, R44
7. Leek JT, Johnson WE, Parker HS, Jaffe AE and Storey JD (2012) The sva package for removing batch effects and other unwanted variation in high-throughput experiments. *Bioinformatics* 28, 882–883
8. Ritchie ME, Phipson B, Wu D et al (2015) limma powers differential expression analyses for RNA-sequencing and microarray studies. *Nucleic Acids Res* 43, e47
9. Benjamini Y and Hochberg Y (1995) Controlling the false discovery rate: a practical and powerful approach to multiple testing. *Journal of the Royal statistical society: series B (Methodological)* 57, 289–300
10. Huang da W, Sherman BT and Lempicki RA (2009) Systematic and integrative analysis of large gene lists using DAVID bioinformatics resources. *Nat Protoc* 4, 44–57
11. Tibshirani R (1996) Regression shrinkage and selection via the lasso. *Journal of the Royal Statistical Society Series B: Statistical Methodology* 58, 267–288
12. McInnes T, Zou D, Rao DS et al (2017) Genome-wide methylation analysis identifies a core set of hypermethylated genes in CIMP-H colorectal cancer. *BMC Cancer* 17, 228
13. Sidak Z (1967) Rectangular Confidence Regions for the Means of Multivariate Normal Distributions. *Journal of the American Statistical Association* 62, 626–633
14. Peto R and Peto J (1972) Asymptotically efficient rank invariant test

- procedures. *Journal of the Royal Statistical Society: Series A (General)* 135, 185–198
15. Silva A-L, Dawson SN, Arends MJ et al (2014) Boosting Wnt activity during colorectal cancer progression through selective hypermethylation of Wnt signaling antagonists. *BMC cancer* 14, 1–10
  16. Guo X and Wang XF (2009) Signaling cross-talk between TGF-beta/BMP and other pathways. *Cell Res* 19, 71–88
  17. Huang F and Chen YG (2012) Regulation of TGF-beta receptor activity. *Cell Biosci* 2, 9
  18. Ding N, Luo H, Zhang T, Peng T, Yao Y and He Y (2023) Correlation between SMADs and Colorectal Cancer Expression, Prognosis, and Immune Infiltrates.
  19. Hibi K, Kodera Y, Ito K, Akiyama S and Nakao A (2004) Methylation pattern of CDH13 gene in digestive tract cancers. *Br J Cancer* 91, 1139–1142
  20. Yan H, He J, Guan Q et al (2017) Identifying CpG sites with different differential methylation frequencies in colorectal cancer tissues based on individualized differential methylation analysis. *Oncotarget* 8, 47356–47364
  21. Choi JE, Kim DS, Kim EJ et al (2008) Aberrant methylation of ADAMTS1 in non-small cell lung cancer. *Cancer Genet Cytogenet* 187, 80–84
  22. Lind GE, Kleivi K, Meling GI et al (2006) ADAMTS1, CRABP1, and NR3C1 identified as epigenetically deregulated genes in colorectal tumorigenesis. *Cell Oncol* 28, 259–272
  23. Cal S and Lopez-Otin C (2015) ADAMTS proteases and cancer. *Matrix Biol* 44–46, 77–85
  24. Zhang Y, Yang J, Wang X and Li X (2021) GNG7 and ADCY1 as diagnostic and prognostic biomarkers for pancreatic adenocarcinoma through bioinformatic-based analyses. *Sci Rep* 11, 20441
  25. Fan Y, Mu J, Huang M et al (2019) Epigenetic identification of ADCY4 as a biomarker for breast cancer: an integrated analysis of adenylate cyclases. *Epigenomics* 11, 1561–1579
